# Supplementary material for: Design of rewritable and read-only non-volatile optical memory elements using photochromic spiropyran-based salts as light-sensitive materials
Source: Royal Society of Chemistry journal article supplement (doi:10.1039/c5tc02100f), 2015-01-01
Supplement: c5tc02100f1.pdf [file c5tc02100f1.pdf]

## Electronic supplementary information for the manuscript

### **Design of rewritable and read-only non-volatile optical memory elements using photochromic spiropyran-based salts as light-sensitive materials**

L. A. Frolova, A. A. Rezvanova, B. S. Lukyanov, N. A. Sanina, P. A. Troshin and S. M. Aldoshin

#### Contents

**Table S1.** Comparison of the results obtained in this work with the selected literature data on the OFET-based memory devices comprising organic photochromic materials

**Figure S1.** Evolution of the transfer characteristics of the devices comprising **SP1** (a) and **SP2** (b) under negative applied voltage ( $V_p = -10$  V) and violet light ( $\lambda = 405$  nm) as a function of the programming time.

**Figure S2.** The absorption spectra of the bilayer films of **SP1**/ $C_{60}$  (a) and **SP2**/ $C_{60}$  (b) in a pristine (as coated) state and after illumination with a violet light for 3 min.

**Figure S3.** Output characteristics of OFETs based on **SP1** (a) and **SP2** (b)

Table S1. Comparison of the results obtained in this work with the selected literature data on the OFET-based memory devices comprising organic photochromic materials

| Entry | Photochromic materials                                                                                                    | Operating voltage, V | Switching time          | Switching coefficient<br>$k_{sw} = I_{DS}(\text{state 1}) / I_{DS}(\text{state 2})$ | Switching conditions                                | Ref.             |
|-------|---------------------------------------------------------------------------------------------------------------------------|----------------------|-------------------------|-------------------------------------------------------------------------------------|-----------------------------------------------------|------------------|
| 0     | 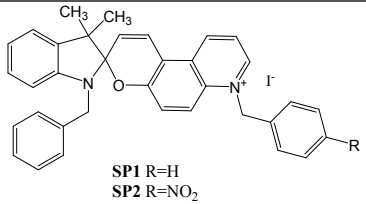 <p>SP1 R=H<br/>SP2 R=NO<sub>2</sub></p> | 3-10                 | 0.5-20 ms               | 10 - 1.7x10 <sup>4</sup>                                                            | Visible light (405 nm) + bias voltage (-10 to 10 V) | <b>This work</b> |
| 1     |                                         | ~30                  | ~30 min                 | ~1.2                                                                                | UV (F)*<br>VIS (B)                                  | [1]              |
| 2     |                                        | ~50                  | ~30 min                 | ~1.8                                                                                | UV (F)<br>VIS (B)                                   | [2]              |
| 3     |                                        | 8-13                 | ~30 min                 | ~1.4                                                                                | UV, bias                                            | [3]              |
| 4     |                                        | ~60                  | ~200 s                  | ~1.002                                                                              | UV (F)<br>VIS (B)                                   | [4]              |
| 5     |                                        | ~50                  | 10 s - 1200 s           | ~1.03-3.0                                                                           | UV (F)<br>VIS (B)                                   | [5]              |
| 6     |                                        | ~90                  | ~1-2 min                | 1.2-2.0                                                                             | UV                                                  | [6]              |
| 7     |                                        | 5-30                 | ~10-40 s<br>~200- 600 s | ~1.3<br>~2.0                                                                        | UV (F)<br>VIS (B)                                   | [7]              |

| Entry | Photochromic materials                                                                                                                                                                                                  | Operating voltage, V | Switching time     | Switching coefficient<br>$k_{sw} = I_{DS}(\text{state 1}) / I_{DS}(\text{state 2})$ | Switching conditions                                       | Ref. |
|-------|-------------------------------------------------------------------------------------------------------------------------------------------------------------------------------------------------------------------------|----------------------|--------------------|-------------------------------------------------------------------------------------|------------------------------------------------------------|------|
| 8     | 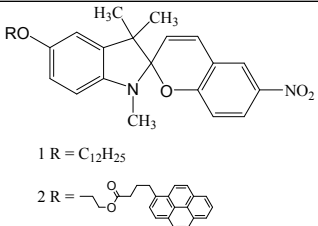 <p>1 R = C<sub>12</sub>H<sub>25</sub><br/>2 R = </p> | ~8                   | ~800 s             | ~2.6                                                                                | UV (F)<br>VIS (B)                                          | [8]  |
| 9     |                                                                                                                                        | ~100                 | ~20 s              | ~1.06                                                                               | UV (F)<br>VIS (B)                                          | [9]  |
| 10    |                                                                                                                                        | ~8                   | 0.5 s              | 10-1000                                                                             | Visible light<br>(405 nm) +<br>bias voltage<br>(-8 to 8 V) | [10] |
| 11    |  <p>DAE1 (R = CH<sub>3</sub>)<br/>DAE2 (R = CO<sub>2</sub>n-C<sub>6</sub>H<sub>13</sub>)</p>                                          | ~100                 | ~5 s**             | ~1.2                                                                                | UV (F)<br>VIS (B)                                          | [11] |
| 12    |                                                                                                                                      | ~90                  | ~60 sec            | ~6                                                                                  | UV (F)<br>VIS (B)                                          | [12] |
| 13    |                                                                                                                                      | 50-80                | 10 sec             | 5-10                                                                                | UV (F)<br>VIS (B)                                          | [13] |
| 14    |                                                                                                                                      | 80-120               | 30 sec –<br>10 min | ~0.2                                                                                | UV (F)<br>VIS (B)                                          | [14] |
| 15    |                                                                                                                                      | 80-120               | 30 sec –<br>10 min | ~2                                                                                  | UV (F)<br>VIS (B)                                          |      |

| Entry | Photochromic materials                                                                                                                                                                                               | Operating voltage, V | Switching time | Switching coefficient<br>$k_{sw} = I_{DS}(\text{state 1}) / I_{DS}(\text{state 2})$ | Switching conditions | Ref. |
|-------|----------------------------------------------------------------------------------------------------------------------------------------------------------------------------------------------------------------------|----------------------|----------------|-------------------------------------------------------------------------------------|----------------------|------|
| 16    | 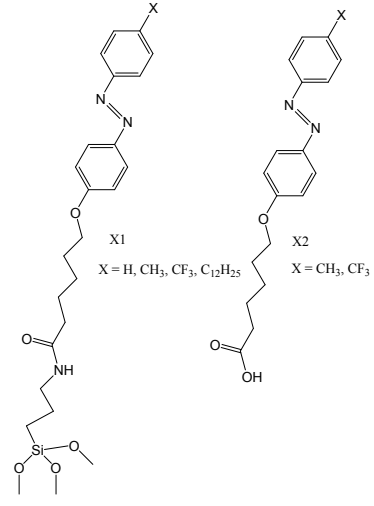 <p>X1<br/>X = H, CH<sub>3</sub>, CF<sub>3</sub>, C<sub>12</sub>H<sub>25</sub></p> <p>X2<br/>X = CH<sub>3</sub>, CF<sub>3</sub></p> | ~4                   | 5-40 min       | ~11-21                                                                              | UV                   | [15] |
| 17    |                                                                                                                                    | ~30                  | ~5-10 min      | ~6-13                                                                               | UV (F)<br>VIS (B)    | [16] |
| 18    |                                                                                                                                   | ~80                  | ~15 min        | ~3                                                                                  | UV (F)<br>VIS (B)    | [17] |

\* Here and below “F” corresponds to forward switching and “B” to the backward transition.

\*\* The characteristic time  $t_R$  of 3-4  $\mu$ s reported in this work corresponds most likely to the photocurrent jump signal as long as it does not lead to any noticeable device programming effect.

## References

1. Y. Ishiguro, M. Frigoli, R. Hayakawa, T. Chikyow and Y. Wakayama, *Org. Electron.*, **2014**, *15*, 1891.
2. Y. Ishiguro, R. Hayakawa, T. Chikyow and Y. Wakayama, *J. Mater. Chem. C*, **2013**, *1*, 3012.
3. Y. Ishiguro, R. Hayakawa, T. Yasuda, T. Chikyow and Y. Wakayama, *ACS Appl. Mater. Inter.*, **2013**, *5*, 9726.
4. Y. Li, H. Zhang, C. Qi and X. Guo, *J. Mater. Chem.*, **2012**, *22*, 4261.
5. H. Zhang, X. Guo, J. Hui, S. Hu, W. Xu and D. Zhu, *Nano Lett.*, **2011**, *11*, 4939–4946.
6. P. Lutsyk, K. Janus, J. Sworakowski, G. Generali, R. Capelli and M. Muccini, *J. Phys. Chem. C*, **2011**, *115*, 3106.
7. Q. Shen, L. Wang, S. Liu, Y. Cao, L. Gan, X. Guo, M. L. Steigerwald, Z. Shuai, Z. Liu and C. Nuckolls, *Adv. Mater.*, **2010**, *22*, 3282.

8. X. Guo, L. Huang, S. O'Brien, P. Kim and C. Nuckolls, *J. Am. Chem. Soc.*, **2005**, *127*, 15045.
9. Q. Shen, Y. Cao, S. Liu, M. L. Steigerwald and X. Guo, *J. P. Chem. C*, **2009**, *113*, 10807.
10. L.A. Frolova, D.K. Susarova, N.A. Sanina, P.A. Troshin and S.M. Aldoshin. *Chem. Comm.*, **2015**, *51*, 6130
11. E. Orgiu, N. Crivillers, M. Herder, L. Grubert, M. Pätzelt, J. Frisch, E. Pavlica, D. T. Duong, G. Bratina, A. Salleo, N. Koch, S. Hecht and P. Samorì, *Nat. Chem.*, **2012**, *4*, 675.
12. M. Yoshida, K. Suemori, S. Uemura, S. Hoshino, N. Takada, T. Kodzasa and T. Kamata, *Jap. J. Appl. Phys.*, **2010**, *49*, 04DK09.
13. M. E. Gemayel, K. Börjesson, M. Herder, D. T. Duong, J. A. Hutchison, C. Ruzié, G. Schweicher, A. Salleo, Y. Geerts, S. Hecht, E. Orgiu and P. Samorì, *Nat. Commun.*, **2015**, *6*, 6330.
14. K. Börjesson, M. Herder, L. Grubert, D. T. Duong, A. Salleo, S. Hecht, E. Orgiu and P. Samorì, *J. Mater. Chem. C*, **2015**, *3*, 4156–4161.
15. C.-W. Tseng, D.-C. Huang and Y.-T. Tao, *ACS Appl. Mater. Inter.*, **2012**, *4*, 5483.
16. C. Raimondo, N. Crivillers, F. Reinders, F. Sander, M. Mayor and P. Samorì, *Proc. Nat. Acad. Sci.*, **2012**, *109*, 12375.
17. N. Crivillers, E. Orgiu, F. Reinders, M. Mayor and P. Samorì, *Adv. Mater.* **2011**, *23*, 1447.

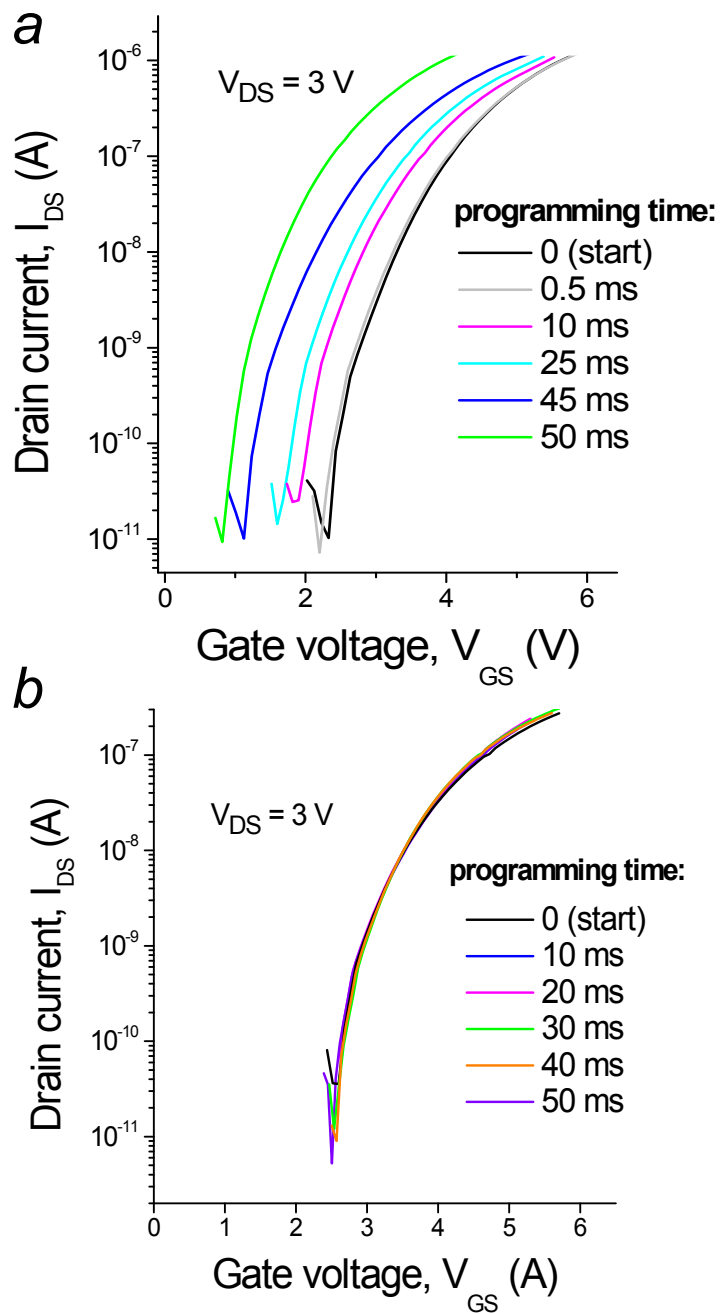

Figure S1. Evolution of the transfer characteristics of the devices comprising **SP1** (a) and **SP2** (b) under negative applied voltage ( $V_p = -10 \text{ V}$ ) and violet light ( $\lambda = 405 \text{ nm}$ ) as a function of the programming time.

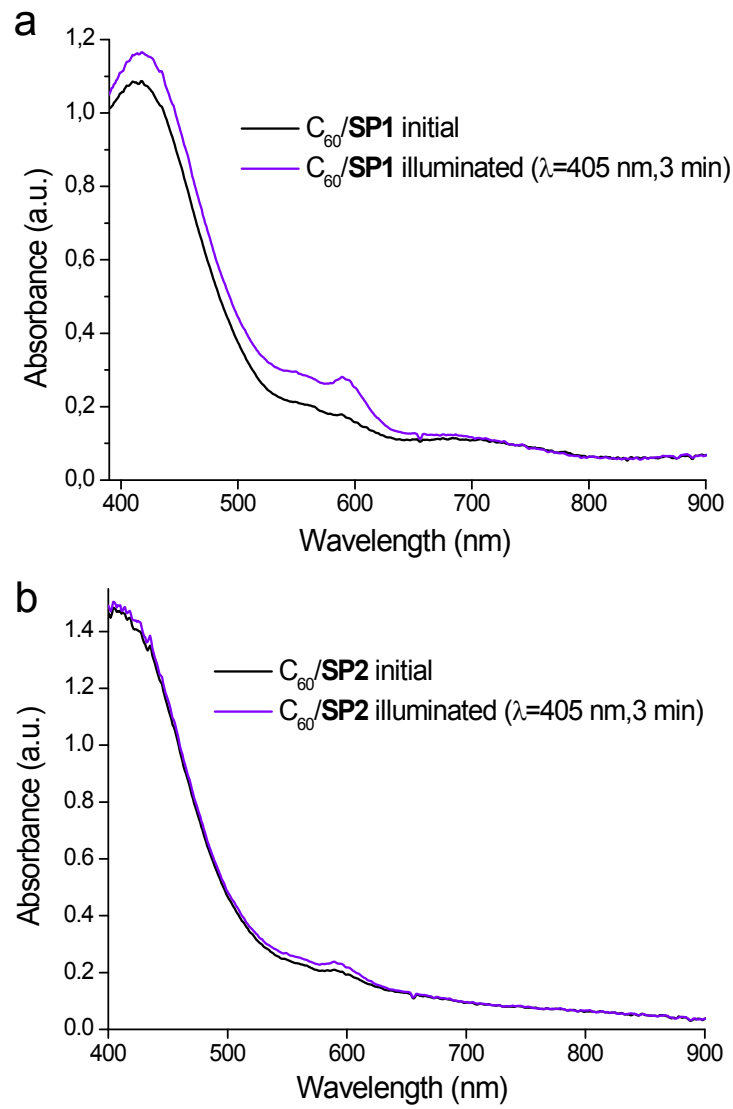

Figure S2. The absorption spectra of the bilayer films of **SP1**/ $C_{60}$  (a) and **SP2**/ $C_{60}$  (b) in a pristine (as coated) state and after illumination with a violet light for 3 min.

*a*

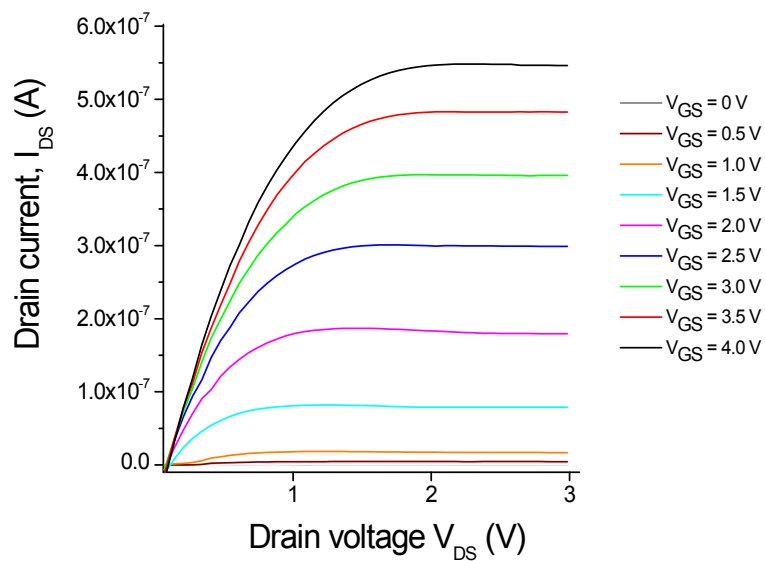

*b*

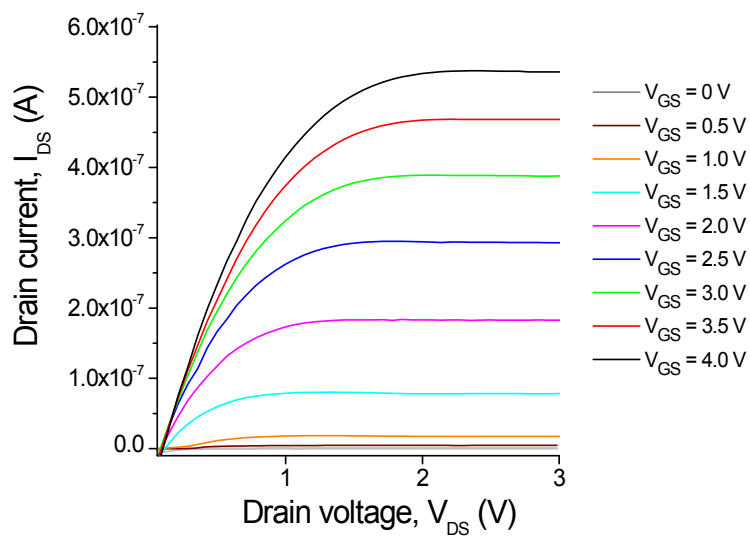

Figure S3. Output characteristics of OFETs based on **SP1** (a) and **SP2** (b)
